# Supplementary material
Source: PubMed Central journal article supplement (PMC8827124)

## **Online Supplementary Material**

*Maternal intake of folates during pregnancy and risk of cerebral palsy in the MOBAND-CP cohort.*

Jonathan Groot, Tanja G. Petersen, Pål Suren, Anne Lise Brantsæter, Peter Uldall, Torben Martinussen, Charlotta Granström, Sjurður F. Olsen, Allen J. Wilcox and Katrine Strandberg-Larsen.

## **Table of contents**

### **Supplementary Methods**

Substantive Model Compatible Fully Conditional Specification

Factor analysis with principal component analysis as the extraction method

Supplementary References

### **Supplementary Tables**

**Supplementary Table 1.** Baseline characteristics according to *periconceptual* folic acid supplementation, stratified by cohort affiliation

**Supplementary Table 2.** *Periconceptual* and early pregnancy folic acid supplementation and cerebral palsy, by regularity of intake

**Supplementary Table 3.** *Periconceptual* folic acid supplementation and cerebral palsy, adjusted for cohort-specific dietary patterns (complete cases)

**Supplementary Table 4.** Total *periconceptual* dietary folate equivalents and cerebral palsy in the Danish National Birth Cohort

**Supplementary Table 5.** *Periconceptual* and early pregnancy folic acid supplementation and cerebral palsy (complete cases)

**Supplementary Table 6.** *Periconceptual* and early pregnancy folic acid supplementation and total midpregnancy dietary folate equivalents and cerebral palsy, according to low or moderate/high gross motor function impairment (complete cases)

**Supplementary Table 7.** *Periconceptual* folic acid supplementation and cerebral palsy by regularity of intake (complete cases)

**Supplementary Table 8.** Joint effects of *periconceptual* dietary and supplemental folate and cerebral palsy (complete cases)

**Supplementary Table 9.** Mid-pregnancy total, supplemental and dietary folates and cerebral palsy (complete cases)

## **Supplementary Figures**

**Supplementary Figure 1.** Flow chart

**Supplementary Figure 2.** *Periconceptual* folic acid supplementation in four-week intervals, according to cohort affiliation

**Supplementary Figure 3.** Odds of cerebral palsy (CP), unilateral CP, and bilateral CP, by level of total midpregnancy dietary folate equivalents

## Supplementary Methods

### Substantive Model Compatible Fully Conditional Specification

Approximately 33 % of the full MOBAND-CP sample had missing data on covariates and/or certain exposures (i.e. mid-pregnancy folates), primarily due to non-responses to the food frequency questionnaires (FFQs) administered in mid-pregnancy. Absolute numbers for each variable are presented in Table 1. We assumed these data to be missing at random, conditional on the covariates included in the imputation models. Missing covariates and exposures were imputed using the Substantive Model Compatible Fully Conditional Specification (SMCFCS) method.<sup>1</sup>

Imputation models were created separately for each outcome (i.e. CP, CP subtypes and CP classified according to gross motor classification) and exposures compatible with the substantive model. The following variables were included in the imputation models: (the exposure(s) and outcome of interest in each substantive model), maternal age at birth, in vitro fertilization, maternal occupational status, pre-pregnancy body mass index, number of cigarettes smoked per day, number of alcoholic beverages per week, periconceptional EPA/DHA supplementation, midpregnancy dietary folate, total eicosapentaenoic acid and docosahexaenoic acid (the covariates), and birth year, cohort affiliation and planned pregnancy (the auxiliary variables). In the imputation models for the substantive models estimating joint effects, interactions between dietary folate and periconceptional and gestational week 9 to 12 folic acid supplementation were also included. Continuous variables, such as total midpregnancy dietary folates equivalents, were first categorized and entered into the imputation models as categorical variables.

In order to arrive at the final imputation models for each substantive model, we evaluated the number of imputations adequate for convergence. The Monte Carlo error and relative efficiency were taken into account. Model convergence was assessed by visual inspection of trace plots with several models with 25, 30 and 35 imputations and 10 and 50 iterations. All final models included 30 imputations with 10 iterations.

### Factor analysis with principal components as the extraction method

Increasingly there has been an interest in quantifying dietary patterns in nutritional epidemiology, as a complementary or alternative approach to examining specific food groups and/or nutrients in isolation. One approach has been factor analysis with principal components as the extraction method, in which factor scores based on factor loadings are assigned to individuals for a number of extracted principal components. In the DNBC and MoBa, this approach has been utilized to capture aspects of the maternal diet during pregnancy, based on data collected in the FFQs administered in each cohort.<sup>2-4</sup>

All observed variables from which the factors are derived might correlate positively or negatively with the components extracted in the analyses (loading). The dimensionality of the original data are reduced to the few linear combinations of the observed variables that are optimized to explain most of the variation in the extraction process.

Principal components are data-specific and therefore two similar extracted principal components from two different populations will not be derived from the same matrix of correlations between various dietary variables. In the absence of a harmonizable measure of the healthfulness of the dietary intakes of mothers in MOBAND-CP, we opted to use the data-specific principal components from each cohort in cohort-stratified analyses. From the DNBC, two extracted principal components were used. These two were named *Vegetable/Prudent* and *Western*.<sup>2</sup> A

DNBC participant with a high score on the *Vegetable/Prudent* factor would have a high intake of vegetables, fruits and legumes. A DNBC participant with a high score on the *Western* factor would have a high intake of pork, beef, potatoes, French fries and butter. Similarly, from MoBa, the two extracted factors *Western* and *Prudent* were used in our cohort-stratified analyses.<sup>3,4</sup> A MoBa participant with a high score on the *Prudent* factor would have a high intake of vegetables, fruits and vegetable oils. A MoBa participant with a high score on the *Western* factor would have a high intake of snacks, sweets and desserts. If the presumed effect of folates is due to residual confounding by nutritive factors present in a dietary pattern characterized as *Vegetable/Prudent* or *Prudent* that correlate with folate intake, we would expect a partial or full attenuation of our results.

### Supplementary References

1. Bartlett JW, Morris TP. Multiple imputation of covariates by substantive-model compatible fully conditional specification. *Stata J.* 2015. doi:10.1177/1536867x1501500206
2. Rasmussen MA, Maslova E, Halldorsson TI, Olsen SF. Characterization of dietary patterns in the Danish National Birth Cohort in relation to preterm birth. *PLoS One.* 2014. doi:10.1371/journal.pone.0093644
3. Englund-Ögge L, Brantsæter AL, Juodakis J, Haugen M, Meltzer HM, Jacobsson B, Sengpiel V. Associations between maternal dietary patterns and infant birth weight, small and large for gestational age in the Norwegian Mother and Child Cohort Study. *Eur J Clin Nutr.* 2019. doi:10.1038/s41430-018-0356-y
4. Brantsæter AL, Haugen M, Samuelsen SO, Torjusen H, Trogstad L, Alexander J, Magnus P, Meltzer HM. A Dietary Pattern Characterized by High Intake of Vegetables, Fruits, and Vegetable Oils Is Associated with Reduced Risk of Preeclampsia in Nulliparous Pregnant Norwegian Women. *J Nutr.* 2009. doi:10.3945/jn.109.10496

**Supplementary Table 1. Baseline characteristics according to *periconceptual* folic acid supplementation, stratified by cohort affiliation**

|                                                     | <i>Periconceptual</i> folic acid supplementation (GWs -4 to 8) |          |        |          |        |          |        |          |
|-----------------------------------------------------|----------------------------------------------------------------|----------|--------|----------|--------|----------|--------|----------|
|                                                     | DNBC                                                           |          |        |          | MoBa   |          |        |          |
|                                                     | None                                                           |          | Any    |          | None   |          | Any    |          |
|                                                     | n                                                              | (%)      | n      | (%)      | n      | (%)      | n      | (%)      |
| <b>Total</b>                                        | 28 585                                                         | 100      | 59 769 | 100      | 31 613 | 100      | 71 022 | 100      |
| <b>Offspring sex</b> (female)                       | 13 962                                                         | 48.8     | 29 110 | 48.7     | 15 345 | 48.5     | 34 723 | 48.9     |
| <b>IVF</b> (yes)                                    | 395                                                            | 1.4      | 2251   | 3.8      | 646    | 2.0      | 2 666  | 3.8      |
| <b>Age at birth</b>                                 |                                                                |          |        |          |        |          |        |          |
| <25                                                 | 3485                                                           | 12.2     | 4826   | 8.1      | 4845   | 15.3     | 6 398  | 9.0      |
| 25-29.9                                             | 10 445                                                         | 36.5     | 23 449 | 39.2     | 9778   | 30.9     | 23 885 | 33.6     |
| 30-34.9                                             | 10 272                                                         | 35.9     | 22 676 | 37.9     | 11 244 | 35.6     | 28 491 | 40.1     |
| ≥35                                                 | 4383                                                           | 15.3     | 8818   | 14.7     | 5746   | 18.2     | 12 248 | 17.3     |
| <b>Socio-occupational position</b>                  |                                                                |          |        |          |        |          |        |          |
| Employed                                            | 21 287                                                         | 74.5     | 45 761 | 76.6     | 23 885 | 75.6     | 58 578 | 82.5     |
| Unemployed                                          | 2856                                                           | 10.0     | 4975   | 8.3      | 2818   | 8.9      | 3489   | 4.9      |
| Student                                             | 3588                                                           | 12.6     | 8213   | 13.7     | 3613   | 11.4     | 7046   | 9.9      |
| Benefits/pension                                    | 846                                                            | 3.0      | 810    | 1.4      | 453    | 1.4      | 663    | 0.9      |
| <i>Missing</i>                                      | 8                                                              | 0.0      | 10     | 0.0      | 844    | 2.7      | 1246   | 1.8      |
| <b>Gestational smoking</b>                          |                                                                |          |        |          |        |          |        |          |
| Non-smokers                                         | 22 461                                                         | 78.6     | 51 243 | 85.7     | 26 927 | 85.2     | 66 453 | 93.6     |
| Smokers                                             | 6082                                                           | 21.3     | 8 456  | 14.1     | 4 316  | 13.7     | 4 126  | 5.8      |
| <i>Missing</i>                                      | 42                                                             | 0.2      | 70     | 0.1      | 370    | 1.2      | 443    | 0.6      |
| <b>Gestational alcohol drinking</b>                 |                                                                |          |        |          |        |          |        |          |
| Non-drinkers                                        | 15 760                                                         | 55.1     | 33 207 | 55.6     | 23 984 | 75.9     | 57 365 | 80.8     |
| Drinkers                                            | 12 784                                                         | 44.7     | 26 507 | 44.3     | 4 063  | 12.9     | 6990   | 9.8      |
| <i>Missing</i>                                      | 41                                                             | 0.1      | 55     | 0.1      | 3 566  | 11.3     | 6667   | 9.4      |
| <b>Pre-pregnancy BMI</b>                            |                                                                |          |        |          |        |          |        |          |
| Mean (SD)                                           | 23.8                                                           | (±4.4)   | 23.5   | (±4.2)   | 24.3   | (±4.5)   | 23.9   | (±4.2)   |
| <i>Missing</i>                                      | 586                                                            | 2.1      | 863    | 1.4      | 1205   | 3.8      | 1588   | 2.2      |
| <b>Periconceptual EPA/DHA supplementation</b>       |                                                                |          |        |          |        |          |        |          |
| None                                                | 28 313                                                         | 99.1     | 57 876 | 96.8     | 27 504 | 87.0     | 30 996 | 43.6     |
| Any                                                 | 272                                                            | 1.0      | 1893   | 3.2      | 4 109  | 13.0     | 40 026 | 56.4     |
| <b>Mid-pregnancy dietary folate intake</b> (µg/day) |                                                                |          |        |          |        |          |        |          |
| Mean (SD)                                           | 354.0                                                          | (±121.1) | 359.3  | (±115.0) | 276.0  | (±104.1) | 277.3  | (±94.5)  |
| <i>Missing</i>                                      | 7984                                                           | 27.9     | 13 808 | 23.1     | 8 064  | 25.5     | 8 141  | 11.5     |
| <b>Mid-pregnancy dietary EPA/DHA</b> (mg/day)       |                                                                |          |        |          |        |          |        |          |
| Mean (SD)                                           | 324.6                                                          | (±303.8) | 341.6  | (±297.1) | 441.5  | (±450.4) | 429.7  | (±395.2) |
| <i>Missing</i>                                      | 7984                                                           | 27.9     | 13 808 | 23.1     | 8 064  | 25.5     | 8 141  | 11.5     |

Data presented as absolute frequencies and (relative frequencies), unless otherwise specified.

Maternal intake of folate during pregnancy and risk of cerebral palsy in the MOBAND-CP cohort, *J. Groot et al.*,  
Online Supplementary Material

---

Abbreviations: DNBC, Danish National Birth Cohort; Norwegian Mother and Child Cohort, MoBa; IVF, in vitro fertilization; SD, standard deviation; BMI, body mass index; EPA, eicosapentaenoic acid; DHA, docosahexaenoic acid; mg, milligram;  $\mu$ g, microgram.

---



**Supplementary Table 2. Periconceptional and early pregnancy folic acid supplementation and cerebral palsy, by regularity of intake**

| Folic acid supplementation | Pop <sub>Total</sub> (n) | Pop <sub>CP</sub> (n) | CP overall        |                             | Pop <sub>CP</sub> (n) | Unilateral CP     |                             | Pop <sub>CP</sub> (n) | Bilateral CP      |                             |
|----------------------------|--------------------------|-----------------------|-------------------|-----------------------------|-----------------------|-------------------|-----------------------------|-----------------------|-------------------|-----------------------------|
|                            |                          |                       | Crude model       | Adjusted model <sup>1</sup> |                       | Crude model       | Adjusted model <sup>1</sup> |                       | Crude model       | Adjusted model <sup>1</sup> |
|                            |                          |                       | OR (95 % CI)      |                             |                       |                   |                             | OR (95 % CI)          |                   |                             |
| GWs -4 to 8                |                          |                       |                   |                             |                       |                   |                             |                       |                   |                             |
| None                       | 35 667                   | 71                    | 1 [Referent]      | 1 [Referent]                | 28                    | 1 [Referent]      | 1 [Referent]                | 36                    | 1 [Referent]      | 1 [Referent]                |
| Irregular                  | 45 785                   | 80                    | 0.96 (0.75, 1.22) | 0.99 (0.77, 1.28)           | 26                    | 0.89 (0.60, 1.32) | 0.86 (0.57, 1.30)           | 40                    | 0.89 (0.62, 1.28) | 1.01 (0.70, 1.46)           |
| Regular                    | 42 706                   | 90                    | 1.06 (0.83, 1.36) | 1.09 (0.84, 1.41)           | 37                    | 0.93 (0.62, 1.38) | 0.86 (0.56, 1.32)           | 42                    | 1.11 (0.78, 1.59) | 1.28 (0.88, 1.86)           |
| GWs -4 to 12               |                          |                       |                   |                             |                       |                   |                             |                       |                   |                             |
| None                       | 29 045                   | <sup>2</sup>          | 1 [Referent]      | 1 [Referent]                | <sup>2</sup>          | 1 [Referent]      | 1 [Referent]                | <sup>2</sup>          | 1 [Referent]      | 1 [Referent]                |
| Irregular                  | 57 652                   | 104                   | 0.90 (0.70, 1.14) | 0.93 (0.72, 1.19)           | 37                    | 0.81 (0.55, 1.18) | 0.76 (0.51, 1.14)           | 51                    | 0.81 (0.57, 1.16) | 0.92 (0.64, 1.32)           |
| Regular                    | 37 461                   | <sup>2</sup>          | 0.92 (0.70, 1.20) | 0.92 (0.69, 1.23)           | <sup>2</sup>          | 0.76 (0.49, 1.18) | 0.67 (0.41, 1.07)           | <sup>2</sup>          | 0.97 (0.66, 1.42) | 1.13 (0.75, 1.69)           |

Absolute frequencies (n) are presented for complete cases (3495 excluded from 'n' due to missing data on regularity of intake); analyses are based on the full multiple imputation dataset.

Abbreviations: ORs, odds ratios; CIs, confidence intervals; CP, cerebral palsy; Pop<sub>Total</sub>, total population; Pop<sub>CP</sub>, cases with specified CP subtype.

<sup>1</sup>Adjusted model controlled for maternal age at birth, in vitro fertilization treatment, EPA/DHA supplementation, pre-pregnancy body mass index, smoking status, alcohol intake, dietary folate intake, and dietary eicosapentaenoic acid and docosahexaenoic acid.

<sup>2</sup>Clouded due to low number of observations in one or more cells.

**Supplementary Table 3. Periconceptional total dietary folate equivalents and cerebral palsy in the Danish National Birth Cohort**

| Total DFEs/day <sup>1</sup> | Pop <sub>Total</sub> (n) | Pop <sub>CP</sub> (n) | CP overall   |            |                             |            |
|-----------------------------|--------------------------|-----------------------|--------------|------------|-----------------------------|------------|
|                             |                          |                       | OR (95 % CI) |            |                             |            |
|                             |                          |                       | Crude model  |            | Adjusted model <sup>2</sup> |            |
| 0 – 299                     | 6292                     | 13                    | 1 [Referent] |            | 1 [Referent]                |            |
| 300 – 399                   | 8564                     | 14                    | 1.00         | 0.53, 1.89 | 1.07                        | 0.56, 2.03 |
| ≥400                        | 34 868                   | 52                    | 0.94         | 0.54, 1.65 | 1.04                        | 0.58, 1.88 |

Absolute frequencies (n) are presented for complete cases; analyses are based on the full multiple imputation dataset.

Abbreviations: ORs, odds ratios; CIs, confidence intervals; CP, cerebral palsy; Pop<sub>Total</sub>, total population; Pop<sub>CP</sub>, cases with specified CP subtype; DFEs, dietary folate equivalents.

<sup>1</sup>Dietary folate during mid-pregnancy used as a proxy for earlier intake

<sup>2</sup>Adjusted model controlled for maternal age at birth, in vitro fertilization treatment, EPA/DHA supplementation, pre-pregnancy body mass index, smoking status, alcohol intake, and dietary eicosapentaenoic acid and docosahexaenoic acid.

**Supplementary Table 4. Periconceptual folic acid supplementation and cerebral palsy, adjusted for cohort-specific dietary patterns (complete cases)**

| Folic acid supplementation | Pop <sub>Total</sub> (n) | CP overall            |                   |                             | Unilateral CP         |                   |                             | Bilateral CP          |                   |                             |
|----------------------------|--------------------------|-----------------------|-------------------|-----------------------------|-----------------------|-------------------|-----------------------------|-----------------------|-------------------|-----------------------------|
|                            |                          | Pop <sub>CP</sub> (n) | OR (95 % CI)      |                             | Pop <sub>CP</sub> (n) | OR (95 % CI)      |                             | Pop <sub>CP</sub> (n) | OR (95 % CI)      |                             |
|                            |                          |                       | Crude model       | Adjusted model <sup>a</sup> |                       | Crude model       | Adjusted model <sup>a</sup> |                       | Crude model       | Adjusted model <sup>1</sup> |
| <b>DNBC</b>                |                          |                       |                   |                             |                       |                   |                             |                       |                   |                             |
| None                       | 15 768                   | 26                    | 1 [Referent]      | 1 [Referent]                | <sup>2</sup>          | 1 [Referent]      | 1 [Referent]                | 16                    | 1 [Referent]      | 1 [Referent]                |
| Any                        | 36 754                   | 55                    | 0.91 (0.57, 1.45) | 0.94 (0.58, 1.53)           | <sup>2</sup>          | 0.86 (0.39, 1.91) | 0.86 (0.35, 2.08)           | 31                    | 0.83 (0.45, 1.52) | 0.93 (0.50, 1.73)           |
| <b>MoBa</b>                |                          |                       |                   |                             |                       |                   |                             |                       |                   |                             |
| None                       | 19 625                   | 45                    | 1 [Referent]      | 1 [Referent]                | 19                    | 1 [Referent]      | 1 [Referent]                | 20                    | 1 [Referent]      | 1 [Referent]                |
| Any                        | 54 805                   | 117                   | 0.93 (0.66, 1.31) | 1.04 (0.73, 1.49)           | 46                    | 0.87 (0.51, 1.48) | 0.84 (0.46, 1.51)           | 51                    | 0.91 (0.54, 1.53) | 1.23 (0.73, 2.07)           |

Abbreviations: ORs, odds ratios; CIs, confidence intervals; CP, cerebral palsy; Pop<sub>Total</sub>, total population; Pop<sub>CP</sub>, cases with specified CP subtype.

<sup>1</sup>Adjusted model controlled for maternal age at birth, in vitro fertilization treatment, EPA/DHA supplementation, pre-pregnancy body mass index, smoking status, alcohol intake, dietary folate intake, and total eicosapentaenoic acid and docosahexaenoic acid.

<sup>2</sup>Clouded due to one or several cells with a low number of observations

**Supplementary Table 5. Periconceptual and early pregnancy folic acid supplementation and cerebral palsy (complete cases)**

| Folic acid supplementation | Pop <sub>Total</sub> (n) | CP overall            |                   |                             | Unilateral CP         |                   |                             | Bilateral CP          |                   |                             |
|----------------------------|--------------------------|-----------------------|-------------------|-----------------------------|-----------------------|-------------------|-----------------------------|-----------------------|-------------------|-----------------------------|
|                            |                          | Pop <sub>CP</sub> (n) | OR (95 % CI)      |                             | Pop <sub>CP</sub> (n) | OR (95 % CI)      |                             | Pop <sub>CP</sub> (n) | OR (95 % CI)      |                             |
|                            |                          |                       | Crude model       | Adjusted model <sup>1</sup> |                       | Crude model       | Adjusted model <sup>1</sup> |                       | Crude model       | Adjusted model <sup>1</sup> |
| GWs -4 to 8                |                          |                       |                   |                             |                       |                   |                             |                       |                   |                             |
| None                       | 35 667                   | 71                    | 1 [Referent]      | 1 [Referent]                | 24                    | 1 [Referent]      | 1 [Referent]                | 36                    | 1 [Referent]      | 1 [Referent]                |
| Any                        | 91 986                   | 174                   | 0.95 (0.72, 1.25) | 0.97 (0.73, 1.29)           | 68                    | 0.89 (0.57, 1.38) | 0.78 (0.49, 1.24)           | 84                    | 0.90 (0.61, 1.34) | 1.08 (0.72, 1.61)           |
| GWs 9 to 12                |                          |                       |                   |                             |                       |                   |                             |                       |                   |                             |
| None                       | 42 746                   | 93                    | 1 [Referent]      | 1 [Referent]                | 34                    | 1 [Referent]      | 1 [Referent]                | 52                    | 1 [Referent]      | 1 [Referent]                |
| Any                        | 84 907                   | 152                   | 0.82 (0.64, 1.06) | 0.74 (0.53, 1.03)           | 58                    | 0.86 (0.56, 1.31) | 0.78 (0.45, 1.38)           | 68                    | 0.66 (0.46, 0.94) | 0.60 (0.38, 0.93)           |
| GWs -4 to 12               |                          |                       |                   |                             |                       |                   |                             |                       |                   |                             |
| None                       | 29 045                   | 62                    | 1 [Referent]      | 1 [Referent]                | 24                    | 1 [Referent]      | 1 [Referent]                | 33                    | 1 [Referent]      | 1 [Referent]                |
| Any                        | 98 608                   | 183                   | 0.87 (0.65, 1.16) | 0.88 (0.65, 1.19)           | 68                    | 0.83 (0.52, 1.33) | 0.72 (0.44, 1.20)           | 87                    | 0.78 (0.52, 1.16) | 0.93 (0.61, 1.41)           |

Abbreviations: ORs, odds ratios; CIs, confidence intervals; CP, cerebral palsy; Pop<sub>Total</sub>, total population; Pop<sub>CP</sub>, cases with specified CP subtype; GWs, gestational weeks.

<sup>1</sup>Adjusted model controlled for maternal age at birth, in vitro fertilization treatment, periconceptual EPA/DHA supplementation, pre-pregnancy body mass index, smoking status, alcohol intake, dietary folate intake, and total eicosapentaenoic acid and docosahexaenoic acid, and periconceptual folic acid supplementation (for GWs 9 – 12).

**Supplementary Table 6. Periconceptional and early pregnancy folic acid supplementation and total midpregnancy dietary folate equivalents and cerebral palsy, according to low or moderate/high gross motor function impairment (complete cases)**

|                                   | Pop <sub>Total</sub><br>(n) | GMFCS I ( <i>low impairment</i> ) |                   |                             | GMFCS II-IV ( <i>moderate/high impairment</i> ) |                   |                             |
|-----------------------------------|-----------------------------|-----------------------------------|-------------------|-----------------------------|-------------------------------------------------|-------------------|-----------------------------|
|                                   |                             | Pop <sub>CP</sub> (n)             | Crude model       | Adjusted model <sup>1</sup> | Pop <sub>CP</sub> (n)                           | Crude model       | Adjusted model <sup>1</sup> |
| <b>Early pregnancy</b>            |                             |                                   |                   |                             |                                                 |                   |                             |
| <i>Folic acid supplementation</i> |                             |                                   |                   |                             |                                                 |                   |                             |
| GWs -4 to 8                       |                             |                                   |                   |                             |                                                 |                   |                             |
| None                              | 35 666                      | <sup>2</sup>                      | 1 [Referent]      | 1 [Referent]                | <sup>2</sup>                                    | 1 [Referent]      | 1 [Referent]                |
| Any                               | 91 983                      | <sup>2</sup>                      | 1.00 (0.70, 1.42) | 0.97 (0.67, 1.41)           | <sup>2</sup>                                    | 0.87 (0.56, 1.36) | 0.95 (0.60, 1.51)           |
| GWs 9 to 12                       |                             |                                   |                   |                             |                                                 |                   |                             |
| None                              | 42 653                      | <sup>2</sup>                      | 1 [Referent]      | 1 [Referent]                | <sup>2</sup>                                    | 1 [Referent]      | 1 [Referent]                |
| Any                               | 84 755                      | <sup>2</sup>                      | 0.80 (0.57, 1.11) | 0.76 (0.54, 1.07)           | <sup>2</sup>                                    | 0.84 (0.55, 1.29) | 0.90 (0.57, 1.42)           |
| GWs -4 to 12                      |                             |                                   |                   |                             |                                                 |                   |                             |
| None                              | 28 983                      | <sup>2</sup>                      | 1 [Referent]      | 1 [Referent]                | <sup>2</sup>                                    | 1 [Referent]      | 1 [Referent]                |
| Any                               | 98 425                      | <sup>2</sup>                      | 0.90 (0.62, 1.30) | 0.88 (0.59, 1.29)           | <sup>2</sup>                                    | 0.82 (0.52, 1.31) | 0.91 (0.56, 1.48)           |
| <b>Mid-pregnancy</b>              |                             |                                   |                   |                             |                                                 |                   |                             |
| <i>Total DFEs/day</i>             |                             |                                   |                   |                             |                                                 |                   |                             |
| 0-199                             | 7328                        | <sup>2</sup>                      | 1 [Referent]      | 1 [Referent]                | <sup>2</sup>                                    | 1 [Referent]      | 1 [Referent]                |
| 200-299                           | 16 966                      | <sup>2</sup>                      | 0.48 (0.25, 0.91) | 0.50 (0.27, 0.96)           | <sup>2</sup>                                    | 1.29 (0.42, 4.01) | 1.33 (0.44, 4.04)           |
| 300-399                           | 13 396                      | 22                                | 0.67 (0.36, 1.25) | 0.71 (0.38, 1.34)           | 13                                              | 1.78 (0.58, 5.45) | 1.87 (0.62, 5.65)           |
| 400-499                           | 9866                        | 11                                | 0.41 (0.19, 0.89) | 0.45 (0.21, 0.96)           | 7                                               | 1.30 (0.38, 4.44) | 1.42 (0.43, 4.73)           |
| ≥500                              | 80 097                      | 80                                | 0.41 (0.24, 0.68) | 0.43 (0.26, 0.73)           | 55                                              | 1.26 (0.46, 3.47) | 1.39 (0.50, 3.84)           |

Abbreviations: RRRs, relative risk ratios; CIs, confidence intervals; CP, cerebral palsy; GMFCS, Gross Motor Function Classification System; Pop<sub>Total</sub>, total population; Pop<sub>CP</sub>, cases with specified CP subtype; GWs, gestational weeks; DFEs, dietary folate equivalents.

<sup>1</sup>Adjusted model controlled for maternal age at birth, in vitro fertilization treatment, EPA/DHA supplementation, pre-pregnancy body mass index, smoking status, alcohol intake, dietary folate intake, and dietary eicosapentaenoic acid and docosahexaenoic acid.

Mid-pregnancy total DFEs analyses additionally adjusted for periconceptional folic acid supplementation and supplementation in gestational weeks 9 – 12.

<sup>2</sup>Clouded due to one or several cells with a low number of observations

**Supplementary Table 7. Periconceptual folic acid supplementation and cerebral palsy by regularity of intake (complete cases)**

| Folic acid supplementation | Pop <sub>Total</sub> (n) | Pop <sub>CP</sub> (n) | CP overall        |                             | Pop <sub>CP</sub> (n) | Unilateral CP     |                             | Pop <sub>CP</sub> (n) | Bilateral CP      |                             |
|----------------------------|--------------------------|-----------------------|-------------------|-----------------------------|-----------------------|-------------------|-----------------------------|-----------------------|-------------------|-----------------------------|
|                            |                          |                       | OR (95 % CI)      |                             |                       | OR (95 % CI)      |                             |                       | OR (95 % CI)      |                             |
|                            |                          |                       | Crude model       | Adjusted model <sup>1</sup> |                       | Crude model       | Adjusted model <sup>1</sup> |                       | Crude model       | Adjusted model <sup>1</sup> |
| GWs -4 to 8                |                          |                       |                   |                             |                       |                   |                             |                       |                   |                             |
| None                       | 35 667                   | 71                    | 1 [Referent]      | 1 [Referent]                | 28                    | 1 [Referent]      | 1 [Referent]                | 36                    | 1 [Referent]      | 1 [Referent]                |
| Irregular                  | 45 785                   | 80                    | 0.88 (0.64, 1.21) | 0.90 (0.65, 1.25)           | 26                    | 0.72 (0.42, 1.23) | 0.66 (0.38, 1.14)           | 40                    | 0.87 (0.55, 1.36) | 1.02 (0.65, 1.60)           |
| Regular                    | 42 706                   | 90                    | 1.06 (0.78, 1.45) | 1.09 (0.78, 1.52)           | 37                    | 1.10 (0.68, 1.80) | 0.95 (0.56, 1.63)           | 42                    | 0.97 (0.62, 1.52) | 1.20 (0.75, 1.93)           |
| GWs -4 to 12               |                          |                       |                   |                             |                       |                   |                             |                       |                   |                             |
| None                       | 29 045                   | 62                    | 1 [Referent]      | 1 [Referent]                | 62                    | 1 [Referent]      | 1 [Referent]                | 24                    | 1 [Referent]      | 1 [Referent]                |
| Irregular                  | 57 652                   | 104                   | 0.84 (0.62, 1.16) | 0.88 (0.63, 1.21)           | 104                   | 0.78 (0.46, 1.30) | 0.71 (0.41, 1.23)           | 37                    | 0.78 (0.50, 1.21) | 0.92 (0.59, 1.44)           |
| Regular                    | 37 461                   | 75                    | 0.94 (0.67, 1.31) | 0.94 (0.66, 1.35)           | 75                    | 0.97 (0.57, 1.66) | 0.80 (0.44, 1.45)           | 30                    | 0.80 (0.49, 1.29) | 1.00 (0.60, 1.66)           |

An additional 3 495 observations excluded due to missing data on regularity of intake

Abbreviations: ORs, odds ratios; CIs, confidence intervals; CP, cerebral palsy; Pop<sub>Total</sub>, total population; Pop<sub>CP</sub>, cases with specified CP subtype; GWs, gestational weeks.

<sup>1</sup>Adjusted model controlled for maternal age at birth, in vitro fertilization treatment, EPA/DHA supplementation, pre-pregnancy body mass index, smoking status, alcohol intake, dietary folate intake, and dietary eicosapentaenoic acid and docosahexaenoic acid.

**Supplementary Table 8. Joint effects of periconceptual dietary and supplemental folate and cerebral palsy (complete cases)**

| Dietary intake and Periconceptual supplementation <sup>1</sup> | Pop <sub>Total</sub> (n) | Pop <sub>CP</sub> (n) | CP overall        |                       |                       |                   | Unilateral CP         |                       |                   |                       | Bilateral CP |  |
|----------------------------------------------------------------|--------------------------|-----------------------|-------------------|-----------------------|-----------------------|-------------------|-----------------------|-----------------------|-------------------|-----------------------|--------------|--|
|                                                                |                          |                       | OR (95 % CI)      |                       | Pop <sub>CP</sub> (n) | OR (95 % CI)      |                       | Pop <sub>CP</sub> (n) | OR (95 % CI)      |                       |              |  |
|                                                                |                          |                       | Crude             | Adjusted <sup>2</sup> |                       | Crude             | Adjusted <sup>2</sup> |                       | Crude             | Adjusted <sup>2</sup> |              |  |
| Low dietary intake*None                                        | 18 764                   | 41                    | 1 [Referent]      | 1 [Referent]          | <sup>3</sup>          | 1 [Referent]      | 1 [Referent]          | <sup>3</sup>          | 1 [Referent]      | 1 [Referent]          |              |  |
| Insufficient dietary intake*None                               | 10 271                   | 22                    | 0.98 (0.58, 1.65) | 1.03 (0.61, 1.73)     | <sup>3</sup>          | 0.55 (0.22, 1.36) | 0.57 (0.22, 1.45)     | <sup>3</sup>          | 1.32 (0.65, 2.69) | 1.37 (0.68, 2.77)     |              |  |
| Sufficient dietary intake*None                                 | 6632                     | 8                     | 0.55 (0.26, 1.18) | 0.59 (0.28, 1.26)     | <sup>3</sup>          | 0.28 (0.07, 1.21) | 0.30 (0.07, 1.29)     | <sup>3</sup>          | 0.79 (0.29, 2.12) | 0.81 (0.30, 2.17)     |              |  |
| Low dietary intake*Any                                         | 47 918                   | 101                   | 0.96 (0.67, 1.39) | 0.98 (0.67, 1.42)     | <sup>3</sup>          | 0.63 (0.36, 1.10) | 0.54 (0.30, 0.96)     | <sup>3</sup>          | 1.04 (0.61, 1.80) | 1.26 (0.73, 2.18)     |              |  |
| Insufficient dietary intake*Any                                | 27 558                   | 43                    | 0.71 (0.46, 1.09) | 0.76 (0.49, 1.17)     | <sup>3</sup>          | 0.71 (0.39, 1.32) | 0.66 (0.35, 1.25)     | <sup>3</sup>          | 0.72 (0.38, 1.37) | 0.87 (0.45, 1.66)     |              |  |
| Sufficient dietary intake*Any                                  | 16 467                   | 30                    | 0.83 (0.52, 1.34) | 0.90 (0.56, 1.46)     | <sup>3</sup>          | 0.63 (0.30, 1.31) | 0.60 (0.28, 1.28)     | <sup>3</sup>          | 1.08 (0.55, 2.09) | 1.27 (0.65, 2.49)     |              |  |

Abbreviations: ORs, odds ratios; CIs, confidence intervals; CP, cerebral palsy; Pop<sub>Total</sub>, total population; Pop<sub>CP</sub>, cases with specified CP subtype; µg, micrograms .

<sup>1</sup>Low dietary intake<sup>s</sup> are defined as intakes below what is recommended for adults (0-299 µg/day). Insufficient dietary intakes are defined as intakes typically sufficient, but below recommendations for women in the reproductive age (300-399 µg/day). Sufficient dietary intakes are defined as meeting or exceeding the New Nordic Recommendations 2012 for women of reproductive age to consume at minimum 400 µg/dietary folate equivalents.

<sup>2</sup>Adjusted model controlled for maternal age at birth, in vitro fertilization treatment, EPA/DHA supplementation, pre-pregnancy body mass index, smoking, alcohol, dietary folate, and total eicosapentaenoic acid and docosahexaenoic acid.

In total 37 997 observations excluded due to missing data from the Food Frequency Questionnaires.

<sup>3</sup>Clouded due to one or several cells with a low number of observations

**Supplementary Table 9. Midpregnancy total, supplemental and dietary folates and cerebral palsy (complete cases)**

|                                         | Pop <sub>Total</sub><br>(n) | Pop <sub>CP</sub><br>(n) | CP overall        |                             | Pop <sub>CP</sub><br>(n) | Unilateral CP     |                             | Pop <sub>CP</sub><br>(n) | Bilateral CP      |                             |
|-----------------------------------------|-----------------------------|--------------------------|-------------------|-----------------------------|--------------------------|-------------------|-----------------------------|--------------------------|-------------------|-----------------------------|
|                                         |                             |                          | OR (95 % CI)      |                             |                          | OR (95 % CI)      |                             |                          | OR (95 % CI)      |                             |
|                                         |                             |                          | Crude model       | Adjusted model <sup>1</sup> |                          | Crude model       | Adjusted model <sup>1</sup> |                          | Crude model       | Adjusted model <sup>1</sup> |
| <b>Total DFEs/day</b>                   |                             |                          |                   |                             |                          |                   |                             |                          |                   |                             |
| 0-199                                   | 7328                        | 22                       | 1 [Referent]      | 1 [Referent]                | 10                       | 1 [Referent]      | 1 [Referent]                | 9                        | 1 [Referent]      | 1 [Referent]                |
| 200-299                                 | 16 966                      | 33                       | 0.65 (0.38, 1.11) | 0.67 (0.39, 1.16)           | 13                       | 0.56 (0.25, 1.28) | 0.57 (0.25, 1.31)           | 13                       | 0.62 (0.27, 1.46) | 0.66 (0.28, 1.54)           |
| 300-399                                 | 13 396                      | 35                       | 0.87 (0.51, 1.48) | 0.93 (0.55, 1.58)           | <sup>2</sup>             | 0.88 (0.40, 1.93) | 0.92 (0.41, 2.03)           | <sup>2</sup>             | 0.91 (0.40, 2.08) | 0.97 (0.43, 2.20)           |
| 400-499                                 | 9 866                       | 17                       | 0.57 (0.30, 1.08) | 0.62 (0.33, 1.17)           | <sup>2</sup>             | 0.30 (0.09, 0.95) | 0.32 (0.10, 1.00)           | <sup>2</sup>             | 0.91 (0.38, 2.19) | 0.99 (0.41, 2.37)           |
| ≥500                                    | 80 097                      | 138                      | 0.57 (0.37, 0.90) | 0.62 (0.39, 0.98)           | 49                       | 0.45 (0.23, 0.88) | 0.47 (0.24, 0.94)           | 72                       | 0.73 (0.37, 1.46) | 0.82 (0.40, 1.66)           |
| <b>Supplemental folic acid (μg/day)</b> |                             |                          |                   |                             |                          |                   |                             |                          |                   |                             |
| 0                                       | 37 922                      | 88                       | 1 [Referent]      | 1 [Referent]                | 33                       | 1 [Referent]      | 1 [Referent]                | 41                       | 1 [Referent]      | 1 [Referent]                |
| 1-399                                   | 50 633                      | 89                       | 0.76 (0.56, 1.02) | 0.80 (0.59, 1.08)           | 36                       | 0.82 (0.51, 1.31) | 0.84 (0.52, 1.38)           | 43                       | 0.79 (0.51, 1.20) | 0.88 (0.56, 1.38)           |
| ≥400                                    | 39 098                      | 68                       | 0.75 (0.55, 1.03) | 0.79 (0.57, 1.10)           | 23                       | 0.68 (0.40, 1.15) | 0.73 (0.42, 1.26)           | 36                       | 0.85 (0.54, 1.33) | 0.90 (0.56, 1.46)           |
| <b>Dietary folates (μg/day)</b>         |                             |                          |                   |                             |                          |                   |                             |                          |                   |                             |
| 0-299                                   | 66 682                      | 142                      | 1 [Referent]      | 1 [Referent]                | 52                       | 1 [Referent]      | 1 [Referent]                | 66                       | 1 [Referent]      | 1 [Referent]                |
| 300-399                                 | 37 872                      | 65                       | 0.81 (0.60, 1.08) | 0.86 (0.64, 1.15)           | 27                       | 0.91 (0.57, 1.46) | 0.99 (0.62, 1.59)           | 32                       | 0.85 (0.56, 1.30) | 0.86 (0.56, 1.33)           |
| ≥400                                    | 23 099                      | 38                       | 0.77 (0.54, 1.10) | 0.84 (0.58, 1.22)           | 13                       | 0.72 (0.39, 1.33) | 0.81 (0.42, 1.54)           | 22                       | 0.96 (0.59, 1.56) | 0.96 (0.58, 1.58)           |

Abbreviations: ORs, odds ratios; CIs, confidence intervals; CP, cerebral palsy; Pop<sub>Total</sub>, total population; Pop<sub>CP</sub>, cases with specified CP subtype; DFEs, dietary folate equivalents; μg, micrograms.

<sup>1</sup>Adjusted model controlled for maternal age at birth, in vitro fertilization treatment, EPA/DHA supplementation, pre-pregnancy body mass index, smoking status, alcohol intake, dietary folate intake, and dietary eicosapentaenoic acid and docosahexaenoic acid, and periconceptual folic acid supplementation. Supplemental folic acid and dietary folates were mutually adjusted for in each respective analysis. Total DFEs additionally adjusted for periconceptual folic acid supplementation and supplementation in gestational weeks 9 – 12.

<sup>2</sup>Clouded due to one or several cells with a low number of observations



### Supplementary Figure 1. Flow chart

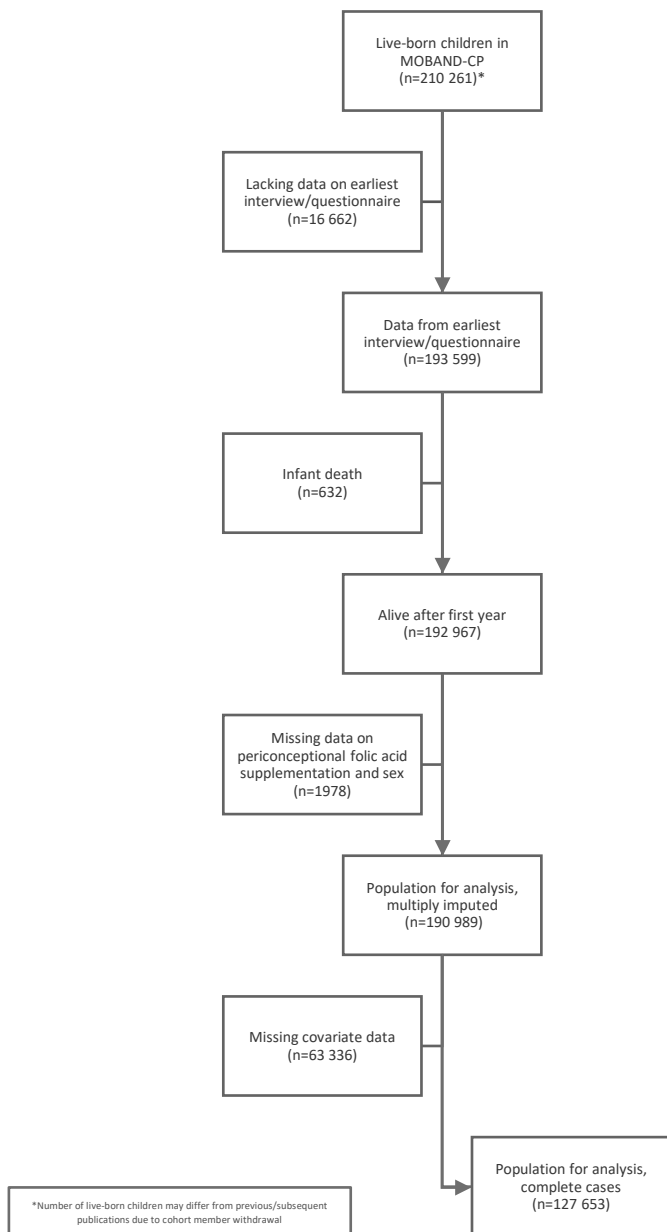

**Supplementary Figure 2. Relative frequency of *periconceptual* folic acid supplementation in four-week intervals, according to cohort affiliation**

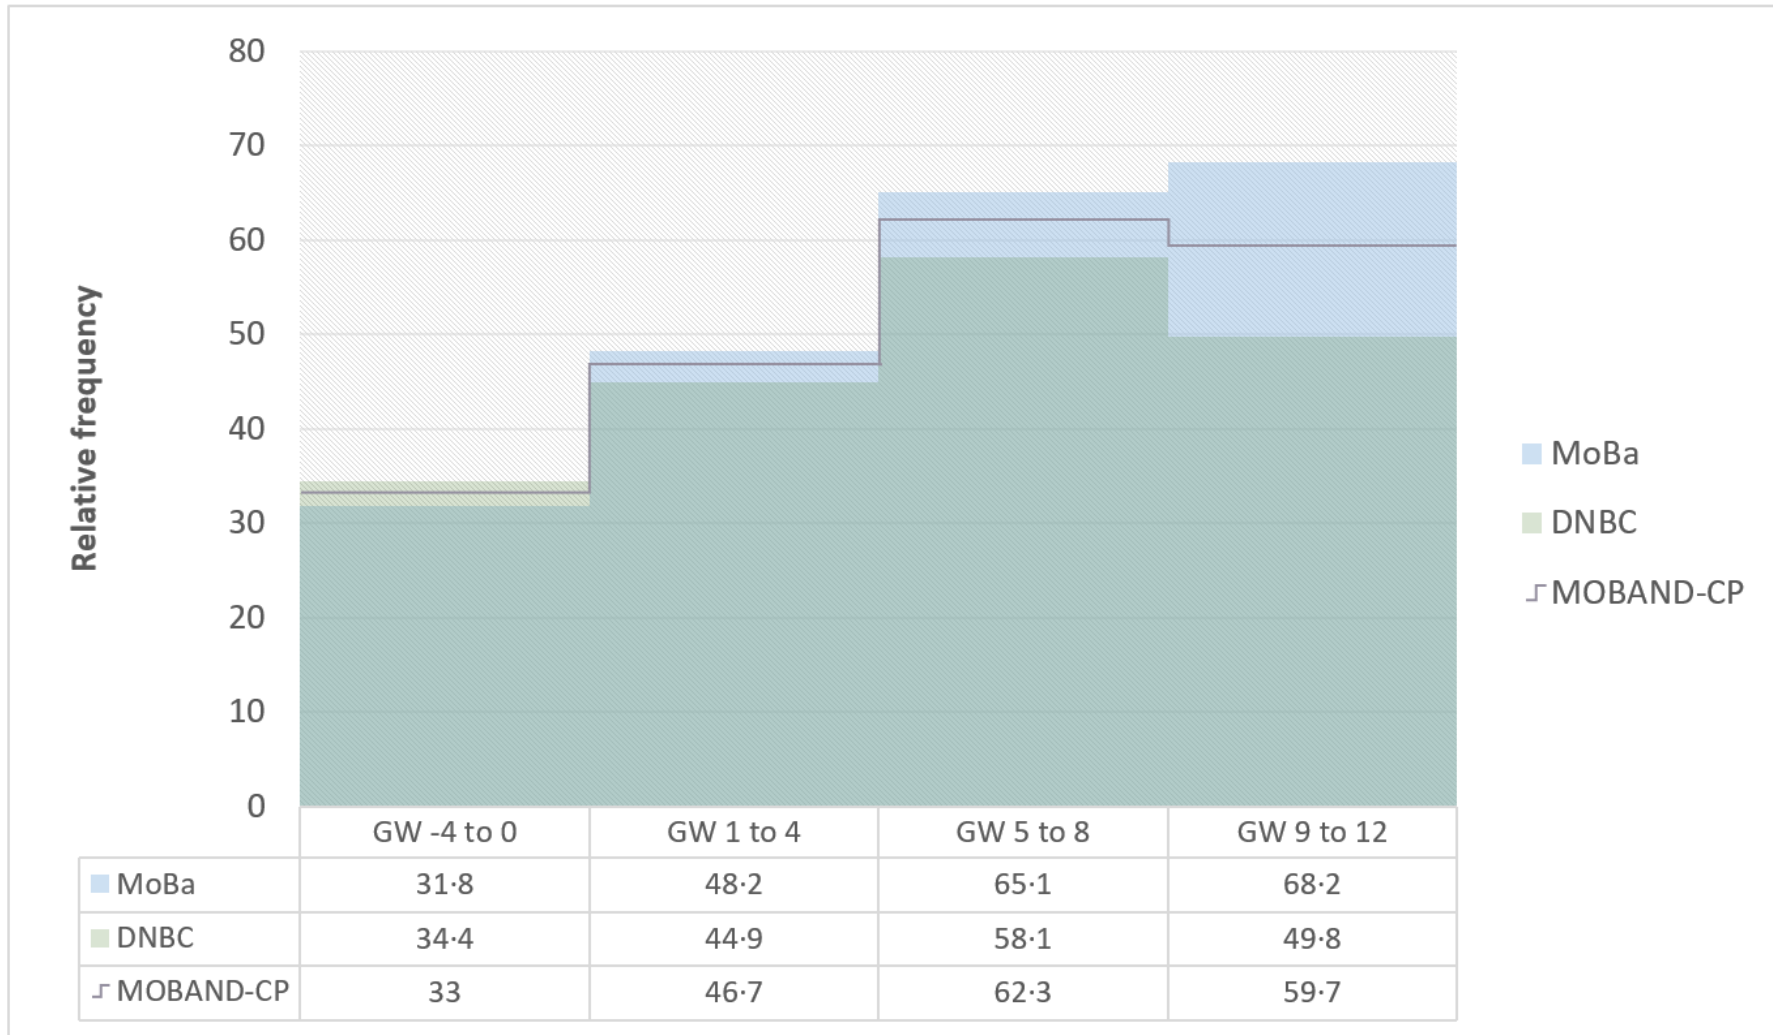

\*Relative frequencies (prevalence) based on full sample excluding 6 447 observations due to lacking data on interval-specific intakes.

**Supplementary Figure 3. Odds of cerebral palsy (CP) overall, unilateral CP, and bilateral CP, by level of total midpregnancy dietary folate equivalents**

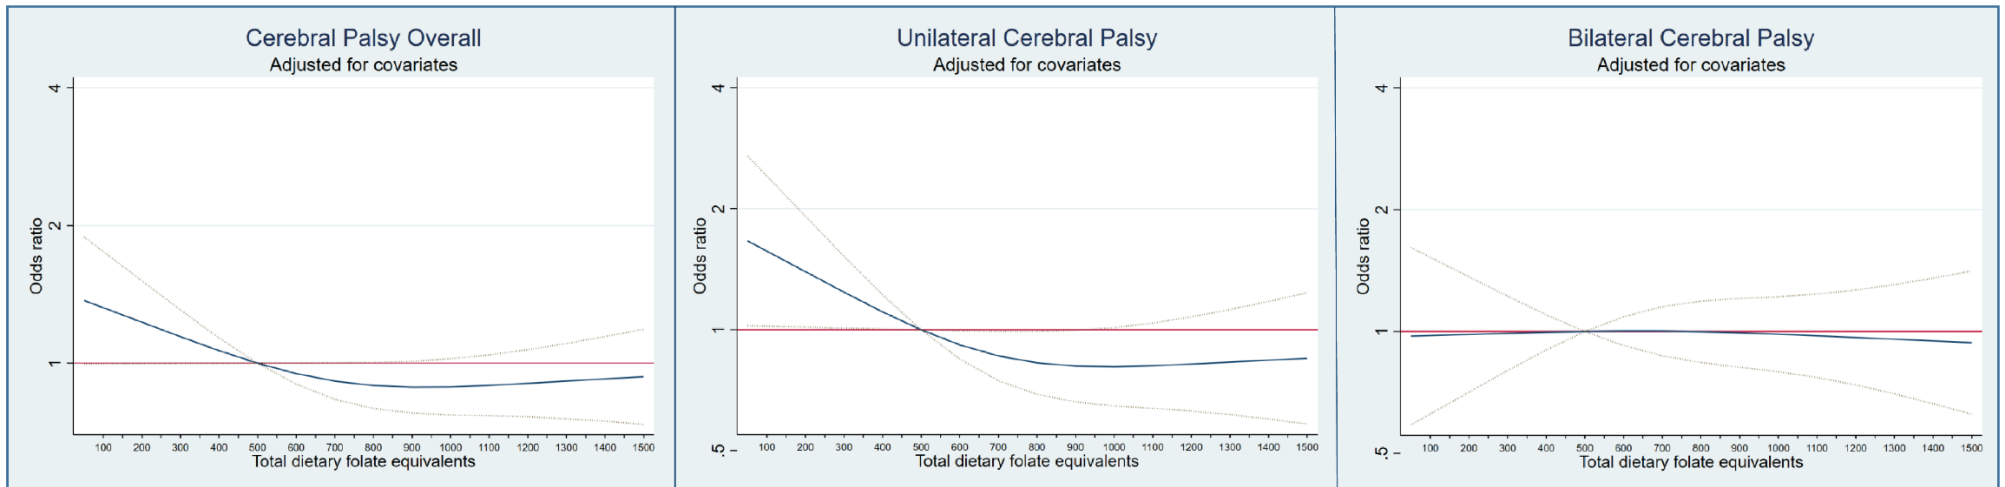

Supplement: nqab351_supplemental_file.pdf [file nqab351_supplemental_file.pdf]
